# Supplementary material for: Dapagliflozin as Monotherapy or Combination Therapy in Japanese Patients with Type 2 Diabetes: an Open-Label Study
Source: Springer Nature journal article supplement (doi:10.1007/s13300-014-0086-7), 2014-10-23
Supplement: MOESM1 [file 9263272]

- Dapagliflozin is a selective inhibitor of the sodium glucose co-transporter 2, approved for the treatment of type 2 diabetes (T2DM).
- Previous studies in Japanese patients with T2DM have shown dapagliflozin to be effective and well tolerated up to 24 weeks.
- This Phase III study evaluated the safety and efficacy of dapagliflozin administered as monotherapy ( $n = 249$ ) or combination therapy ( $n = 479$ ) with existing antihyperglycemic agents over 52 weeks in Japanese patients with T2DM.
- Dapagliflozin administered as monotherapy or combination therapy was well tolerated over 52 weeks in Japanese patients with inadequately controlled T2DM.
- In patients receiving dapagliflozin as monotherapy or combination therapy, reductions from baseline to week 52 were observed in glycosylated hemoglobin ( $\text{HbA}_{1c}$ ), weight and systolic blood pressure.

This summary slide represents the opinions of the authors. Sponsorship for this study was funded by Astra Zeneca and Bristol-Myers Squibb. Medical writing assistance for this study was provided by Karen Pemberton of PPSI (a PAREXEL company). For a full list of acknowledgments and conflicts of interest for all authors of this article, please see the full text online. Copyright © The Authors 2014. Creative Commons Attribution Noncommercial License (CC BY-NC).
